# Supplementary material for: Rubisco carboxylation kinetics and inorganic carbon utilization in polar versus cold-temperate seaweeds
Source: PubMed Central journal article supplement (PMC6382342; doi:10.1093/jxb/ery443), 2018-12-21
Supplement: ery443_suppl_supplementary_table_s1.pdf [file ery443_suppl_supplementary_table_s1.pdf]

## Supplementary data

**Table S1.** Form I Rubisco carboxylation kinetics at 25°C taken from other datasets and used in Figure 3; n.d., not determined.

|                                      | $K_c$<br>( $\mu\text{M}$ ) | $k_{\text{cat}}^c$<br>( $\text{s}^{-1}$ ) | $k_{\text{cat}}^c/K_c$<br>( $\text{s}^{-1} \text{mM}^{-1}$ ) | References                   |
|--------------------------------------|----------------------------|-------------------------------------------|--------------------------------------------------------------|------------------------------|
| <b>Rhodophyta</b>                    |                            |                                           |                                                              |                              |
| <b>Cyanidiophyceae</b>               |                            |                                           |                                                              |                              |
| <i>Cyanidium caldarium</i>           | 7                          | 1.3                                       | 186                                                          | Badger <i>et al.</i> , 1998  |
| <i>Cyanidium partita</i>             | 7                          | 1.6                                       | 229                                                          | Badger <i>et al.</i> , 1998  |
| <i>Galdieria sulfuraria</i>          | 3                          | 1.2                                       | 364                                                          | Whitney <i>et al.</i> , 2001 |
| <b>Florideophyceae</b>               |                            |                                           |                                                              |                              |
| <i>Griffithsia monilis</i>           | 9                          | 2.6                                       | 280                                                          | Whitney <i>et al.</i> , 2001 |
| <b>Ochrophyta</b>                    |                            |                                           |                                                              |                              |
| <b>Phaeophyceae</b>                  |                            |                                           |                                                              |                              |
| <i>Laminaria hyperborea</i>          | 12                         | n.d.                                      | n.d.                                                         | Kuppers and Weidner, 1980    |
| <b>Bacillariophyceae (diatoms)</b>   |                            |                                           |                                                              |                              |
| <i>Bellerochea cf. horologicalis</i> | 50                         | 2.1                                       | 41                                                           | Young <i>et al.</i> , 2016   |
| <i>Chaetoceros calcitrans</i>        | 25                         | 2.6                                       | 103                                                          | Young <i>et al.</i> , 2016   |
| <i>Chaetoceros muelleri</i>          | 23                         | 2.4                                       | 104                                                          | Young <i>et al.</i> , 2016   |
| <i>Cylindrotheca fusiformis</i>      | n.d.                       | 3.7                                       | n.d.                                                         | Young <i>et al.</i> , 2016   |
| <i>Fragilariopsis cylindrus</i>      | 64                         | 3.5                                       | 55                                                           | Young <i>et al.</i> , 2016   |
| <i>Phaeodactylum tricornutum</i>     | 41                         | 3.3                                       | 81                                                           | Young <i>et al.</i> , 2016   |
| <i>Skeletonema marinoi</i>           | 68                         | 3.2                                       | 47                                                           | Young <i>et al.</i> , 2016   |
| <i>Thalassiosira oceanica</i>        | 65                         | 2.4                                       | 36                                                           | Young <i>et al.</i> , 2016   |
| <i>Thalassiosira weissflogii</i>     | 65                         | 3.2                                       | 49                                                           | Young <i>et al.</i> , 2016   |
| <b>Haptophyta</b>                    |                            |                                           |                                                              |                              |
| <i>Pavlova lutheri</i>               | 14                         | 2.5                                       | 172                                                          | Heureux <i>et al.</i> , 2017 |
| <i>Pleurochrysis carterae</i>        | 18                         | 3.3                                       | 186                                                          | Heureux <i>et al.</i> , 2017 |
| <i>Tisochrysis lutea</i>             | 24                         | 2.2                                       | 91                                                           | Heureux <i>et al.</i> , 2017 |
| <b>Chlorophyta</b>                   |                            |                                           |                                                              |                              |
| <i>Chlamydomonas reinhardtii</i>     | 31                         | 2.1                                       | 68                                                           | Genkov <i>et al.</i> , 2010  |
| <i>Codium fragile</i>                | 43                         | n.d.                                      | n.d.                                                         | Yeoh <i>et al.</i> , 1981    |
| <i>Scenedesmus obliquus</i>          | 38                         | n.d.                                      | n.d.                                                         | Jordan and Ogren, 1981       |
| <i>Ulva sp.</i>                      | 70                         | n.d.                                      | n.d.                                                         | Yeoh <i>et al.</i> , 1981    |

**C<sub>3</sub> higher plants**

|                               |    |     |     |                                      |
|-------------------------------|----|-----|-----|--------------------------------------|
| <i>Arabidopsis thaliana</i>   | 14 | 3.2 | 222 | Whitney <i>et al.</i> , 2011         |
| <i>Avena sativa</i>           | 11 | 2.3 | 213 | Hermida-Carrera <i>et al.</i> , 2016 |
| <i>Beta vulgaris</i>          | 11 | 2.0 | 185 | Hermida-Carrera <i>et al.</i> , 2016 |
| <i>Brassica oleracea</i>      | 12 | 2.1 | 178 | Hermida-Carrera <i>et al.</i> , 2016 |
| <i>Capsicum annuum</i>        | 10 | 1.9 | 198 | Hermida-Carrera <i>et al.</i> , 2016 |
| <i>Chenopodium alba</i>       | 11 | 2.9 | 259 | Kubien <i>et al.</i> , 2008          |
| <i>Coffea Arabica</i>         | 11 | 2.1 | 191 | Hermida-Carrera <i>et al.</i> , 2016 |
| <i>Crithmum maritimum</i>     | 9  | 3.4 | 378 | Galmés <i>et al.</i> , 2014          |
| <i>Cucurbita maxima</i>       | 9  | 2.2 | 244 | Hermida-Carrera <i>et al.</i> , 2016 |
| <i>Eucalyptus neglecta</i>    | 8  | 2.5 | 312 | Galmés <i>et al.</i> , 2014          |
| <i>Flaveria cronquistii</i>   | 11 | 3.1 | 287 | Kubien <i>et al.</i> , 2008          |
| <i>Glycine max</i>            | 9  | 1.5 | 174 | Hermida-Carrera <i>et al.</i> , 2016 |
| <i>Hordeum vulgare</i>        | 9  | 2.4 | 267 | Hermida-Carrera <i>et al.</i> , 2016 |
| <i>Ipomoea batatas</i>        | 12 | 2.5 | 208 | Hermida-Carrera <i>et al.</i> , 2016 |
| <i>Lactuca sativa</i>         | 11 | 2.2 | 198 | Hermida-Carrera <i>et al.</i> , 2016 |
| <i>Limonium gibertii</i>      | 8  | 4.6 | 561 | Parry <i>et al.</i> , 2007           |
| <i>Manihot esculenta</i>      | 6  | 1.4 | 229 | Hermida-Carrera <i>et al.</i> , 2016 |
| <i>Medicago sativa</i>        | 10 | 1.7 | 175 | Hermida-Carrera <i>et al.</i> , 2016 |
| <i>Nicotiana tabacum</i>      | 11 | 3.4 | 309 | Whitney <i>et al.</i> , 1999         |
| <i>Oryza sativa</i>           | 8  | 2.1 | 262 | Hermida-Carrera <i>et al.</i> , 2016 |
| <i>Phaseolus vulgaris</i>     | 8  | 1.7 | 218 | Hermida-Carrera <i>et al.</i> , 2016 |
| <i>Solanum lycopersicum</i>   | 10 | 2.3 | 237 | Hermida-Carrera <i>et al.</i> , 2016 |
| <i>Spinacia oleracea</i>      | 12 | 3.2 | 265 | Kubien <i>et al.</i> , 2008          |
| <i>Triticum aestivum</i>      | 11 | 2.7 | 248 | Carmo-Silva <i>et al.</i> , 2010     |
| <i>Teucrium heterophyllum</i> | 7  | 2.7 | 386 | Galmés <i>et al.</i> , 2014          |

**C<sub>4</sub> higher plants**

|                              |    |     |     |                                      |
|------------------------------|----|-----|-----|--------------------------------------|
| <i>Amaranthus edulis</i>     | 18 | 4.1 | 225 | Kubien <i>et al.</i> , 2008          |
| <i>Amaranthus hybridus</i>   | 16 | 3.8 | 237 | Jordan and Ogren, 1981               |
| <i>Cynodon dactylon</i>      | 21 | 3.7 | 176 | Carmo-Silva <i>et al.</i> , 2010     |
| <i>Flaveria australasica</i> | 22 | 3.8 | 173 | Kubien <i>et al.</i> , 2008          |
| <i>Flaveria bidentis</i>     | 20 | 4.2 | 208 | Kubien <i>et al.</i> , 2008          |
| <i>Flaveria kochiana</i>     | 23 | 3.7 | 163 | Kubien <i>et al.</i> , 2008          |
| <i>Flaveria trinervia</i>    | 18 | 4.4 | 246 | Kubien <i>et al.</i> , 2008          |
| <i>Paspalum dilatatum</i>    | 20 | 3.4 | 171 | Carmo-Silva <i>et al.</i> , 2010     |
| <i>Saccharum officinarum</i> | 26 | 3.9 | 148 | Hermida-Carrera <i>et al.</i> , 2016 |
| <i>Sorghum bicolor</i>       | 30 | 5.4 | 180 | Sage and Seemann, 1993               |
| <i>Zea mays</i>              | 32 | 4.1 | 130 | Hermida-Carrera <i>et al.</i> , 2016 |
| <i>Zoysia japonica</i>       | 18 | 4.1 | 222 | Carmo-Silva <i>et al.</i> , 2010     |

---

## References

- Badger MRT, Andrews J, Whitney SM, Ludwig M, Yellowlees DC, Leggat W, Price GD.** 1998. The diversity and coevolution of Rubisco, plastids, pyrenoids, and chloroplast-based CO<sub>2</sub>-concentrating mechanisms in algae. *Canadian Journal of Botany* **76**, 1052–1071.
- Carmo-Silva AE, Keys AJ, Andralojc PJ, Powers SJ, Arrabaca MC, Parry MAJ.** 2010. Rubisco activities, properties, and regulation in three different C<sub>4</sub> grasses under drought. *Journal of Experimental Botany* **61**, 2355–2366.
- Galmés J, Kapralov MV, Andralojc PJ, Conesa MÀ, Keys AJ, Parry MAJ, Flexas J.** 2014. Expanding knowledge of the Rubisco kinetics variability in plant species: environmental and evolutionary trends. *Plant, Cell & Environment* **37**, 1989–2001.
- Genkov T, Meyer M, Griffiths H, Spreitzer RJ.** 2010. Functional Hybrid Rubisco Enzymes with Plant Small Subunits and Algal Large Subunits engineered rbcS cDNA for expression in *Chlamydomonas*. *Journal of Biological Chemistry* **285**, 19833–19841.
- Hermida-Carrera C, Kapralov MV, Galmés J.** 2016. Rubisco catalytic properties and temperature response in crops. *Plant Physiology* **171**, 2549–2561.
- Heureux AM, Young JN, Whitney SM, Eason-Hubbard MR, Lee RBY, Sharwood RE, Rickaby REM.** 2017. The role of Rubisco kinetics and pyrenoid morphology in shaping the CO<sub>2</sub>-concentrating mechanisms of Haptophyte microalgae. *Journal of Experimental Botany* **68**, 3959–3969.
- Jordan DB, Ogren WL.** 1981. Species variation in the specificity of ribulose biphosphate carboxylase/oxygenase. *Nature* **291**, 513–515.
- Kubien DS, Whitney SM, Moore PV, Jesson LK.** 2008. The biochemistry of Rubisco in *Flaveria*. *Journal of Experimental Botany* **59**, 1767–1777.
- Kuppers U, Weidner M.** 1980. Seasonal-variation of enzyme activities in *Laminaria hyperborea*. *Planta* **148**, 222–230.
- Parry MAJ, Madgwick PJ, Carvalho JFC, Andralojc PJ.** 2007. Prospects for increasing photosynthesis by overcoming the limitations of Rubisco. *Journal of Agricultural Science* **145**, 31–43.

- Sage RF, Seemann JR.** 1993. Regulation of ribulose-1,5-bisphosphate carboxylase/oxygenase activity in response to reduced light intensity in C<sub>4</sub> plants. *Plant Physiology* **102**, 21–28.
- Whitney SM, Baldet P, Hudson GS, Andrews TJ.** 2001. Form I Rubiscos from non-green algae are expressed abundantly but not assembled in tobacco chloroplasts. *The Plant Journal* **26**, 535–547.
- Whitney SM, Houtz RL, Alonso H.** 2011. Advancing our understanding and capacity to engineer nature's CO<sub>2</sub>-sequestering enzyme, Rubisco. *Plant Physiology* **155**, 27–35.
- Whitney SM, von Caemmerer S, Hudson GS, Andrews TJ.** 1999. Directed mutation of the Rubisco large subunit of tobacco influences photorespiration and growth. *Plant Physiology* **121**, 579–588.
- Yeoh HH, Badger MR, Watson L.** 1981. Variations in kinetic-properties of ribulose-1,5-bisphosphate carboxylases among plants. *Plant Physiology* **67**, 1151–1155.
- Young JN, Heureux AMC, Sharwood RE, Rickaby REM, Morel FMM, Whitney SM.** 2016. Large variation in the Rubisco kinetics of diatoms reveals diversity among their carbon-concentrating mechanisms. *Journal of Experimental Botany* **67**, 3445–3456.
